# Supplementary material
Source: MDPI journal article supplement (https://www.mdpi.com/2075-163X/12/3/284)
Supplement: s1 [file s1]

# Supplementary Materials: Archaeometric study of the white marbles from Madonna della Febbre altar in San Domenico Church (Cosenza-Southern Italy)

Natalia Rovella , Stefania Bosco and Donatella Barca

**Table S1.** Manganese concentration (in ppm) determined by ICP-MS in samples (SD2, SD3, SD4) and Standard Reference Material (Mica Schist SDC1) by USGS. The measurements were repeated three times, thus mean and deviation standard were calculated and reported in the table.

|                            | SD2  | SD3  | SD4  | Standard Reference<br>Material<br>Mica Schist SDC1 | Mica Schist<br>SDC1 Certified<br>value | Mica Schist<br>SDC1 Measured<br>value | Precision Std/<br>Mica Schist<br>SDC1 Meas-<br>ured in % | Accuracy Certi-<br>fied/Measured in % |
|----------------------------|------|------|------|----------------------------------------------------|----------------------------------------|---------------------------------------|----------------------------------------------------------|---------------------------------------|
| <b>Mn (ppm)</b>            | 14.5 | 379  | 11.7 | Mica Schist SDC1                                   | 880                                    | 906                                   | 7.28                                                     | -2.95                                 |
| <b>Std +/-</b>             | 1.01 | 15.3 | 0.77 | std +/-                                            | 60                                     | 66                                    |                                                          |                                       |
| <b>Detection<br/>Limit</b> | 0.17 |      |      |                                                    |                                        |                                       |                                                          |                                       |
